# Supplementary material for: The Natural Combination Medicine Traumeel (Tr14) Improves Resolution of Inflammation by Promoting the Biosynthesis of Specialized Pro-Resolving Mediators
Source: MDPI journal article supplement (doi:10.3390/ph14111123), 2021-11-03
Supplement: s1 [file s1]

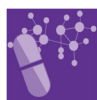

## Supplementary Materials

## Suppl. Fig 1

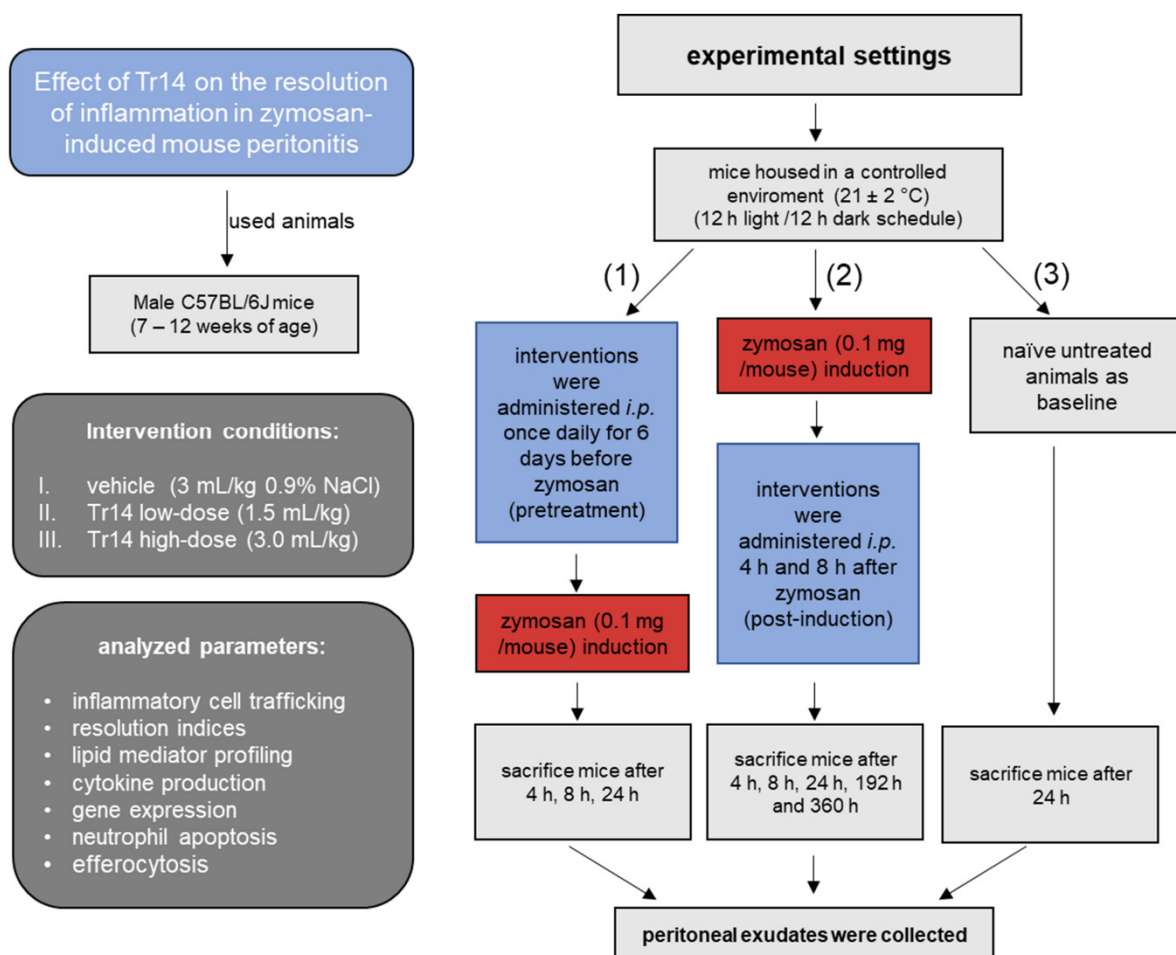

**Supplemental Figure S1:** Study plan for investigation of the effects of Tr14 on the resolution of inflammation in zymosan-induced mouse peritonitis.

## Suppl. Fig 2

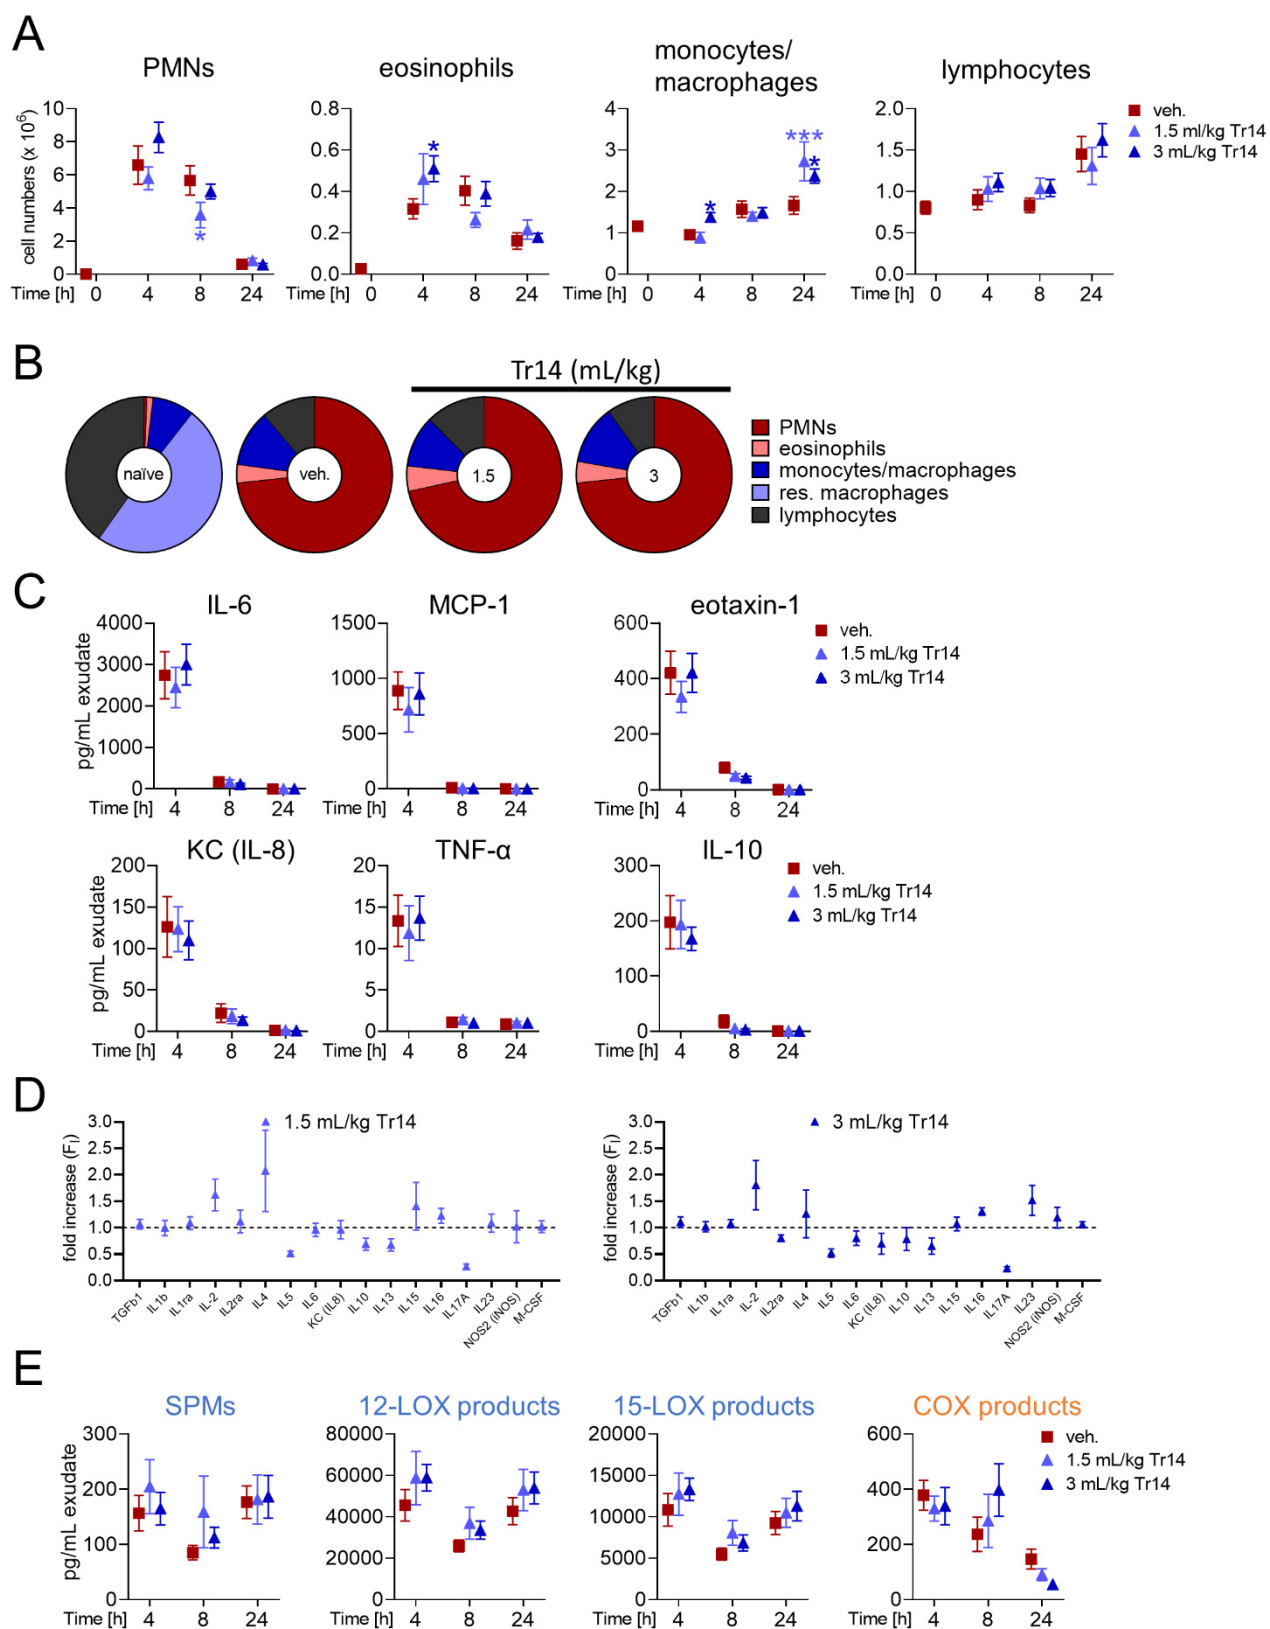

**Supplemental Figure S2:** Self-resolving inflammation was initiated by injection of zymosan (0.1 mg/mouse, *i.p.*) into mice. Before zymosan injection, Tr14 (3 mL/kg or 1.5 mL/kg) or vehicle (veh., 0.9% NaCl) were administered *i.p.* once daily for six days. Peritoneal exudates were collected after 4, 8 and 24 h ( $n = 6-8$ ; outliers were removed) post zymosan injection, and from naïve untreated mice representing time point 0 h ( $n = 6$ ). **(A)** Quantification of cell numbers of PMNs, eosinophils, monocytes/macrophages and lymphocytes in the peritoneum, shown as mean  $\pm$  SEM for indicated time points,  $* < p < 0.05$ ;  $***p < 0.001$ ;  $p$  values were calculated versus vehicle for each time point; unpaired two-way ANOVA with Dunnett's multiple comparison test. **(B)** Cell composition in the peritoneal exudates 4 h after zymosan injection against naïve untreated mice are shown in pie charts. **(C)** Cytokine levels were measured at indicated time points and shown in pg/mL exudate as mean  $\pm$  SEM. **(D)** mRNA levels of inflammation-related genes in peritoneal lavages 4 h post zymosan injection, analyzed by RT-PCR. Data were given as mean  $\pm$  SEM as fold increase of vehicle group. **(E)** LM levels in peritoneal lavages (summarized in relevant groups: SPMs (LXA<sub>4</sub>, PD1, MaR1, RvD2 and RvD5), 12-LOX products (14-HDHA and 12-HETE), 15-LOX (17-HDHA and 15-HETE) and COX products (PGE<sub>2</sub> and TXB<sub>2</sub>)) at the indicated time points were analyzed by UPLC-MS-MS and are shown in pg/mL exudate as mean  $\pm$  SEM as line charts.

## Suppl. Fig 3

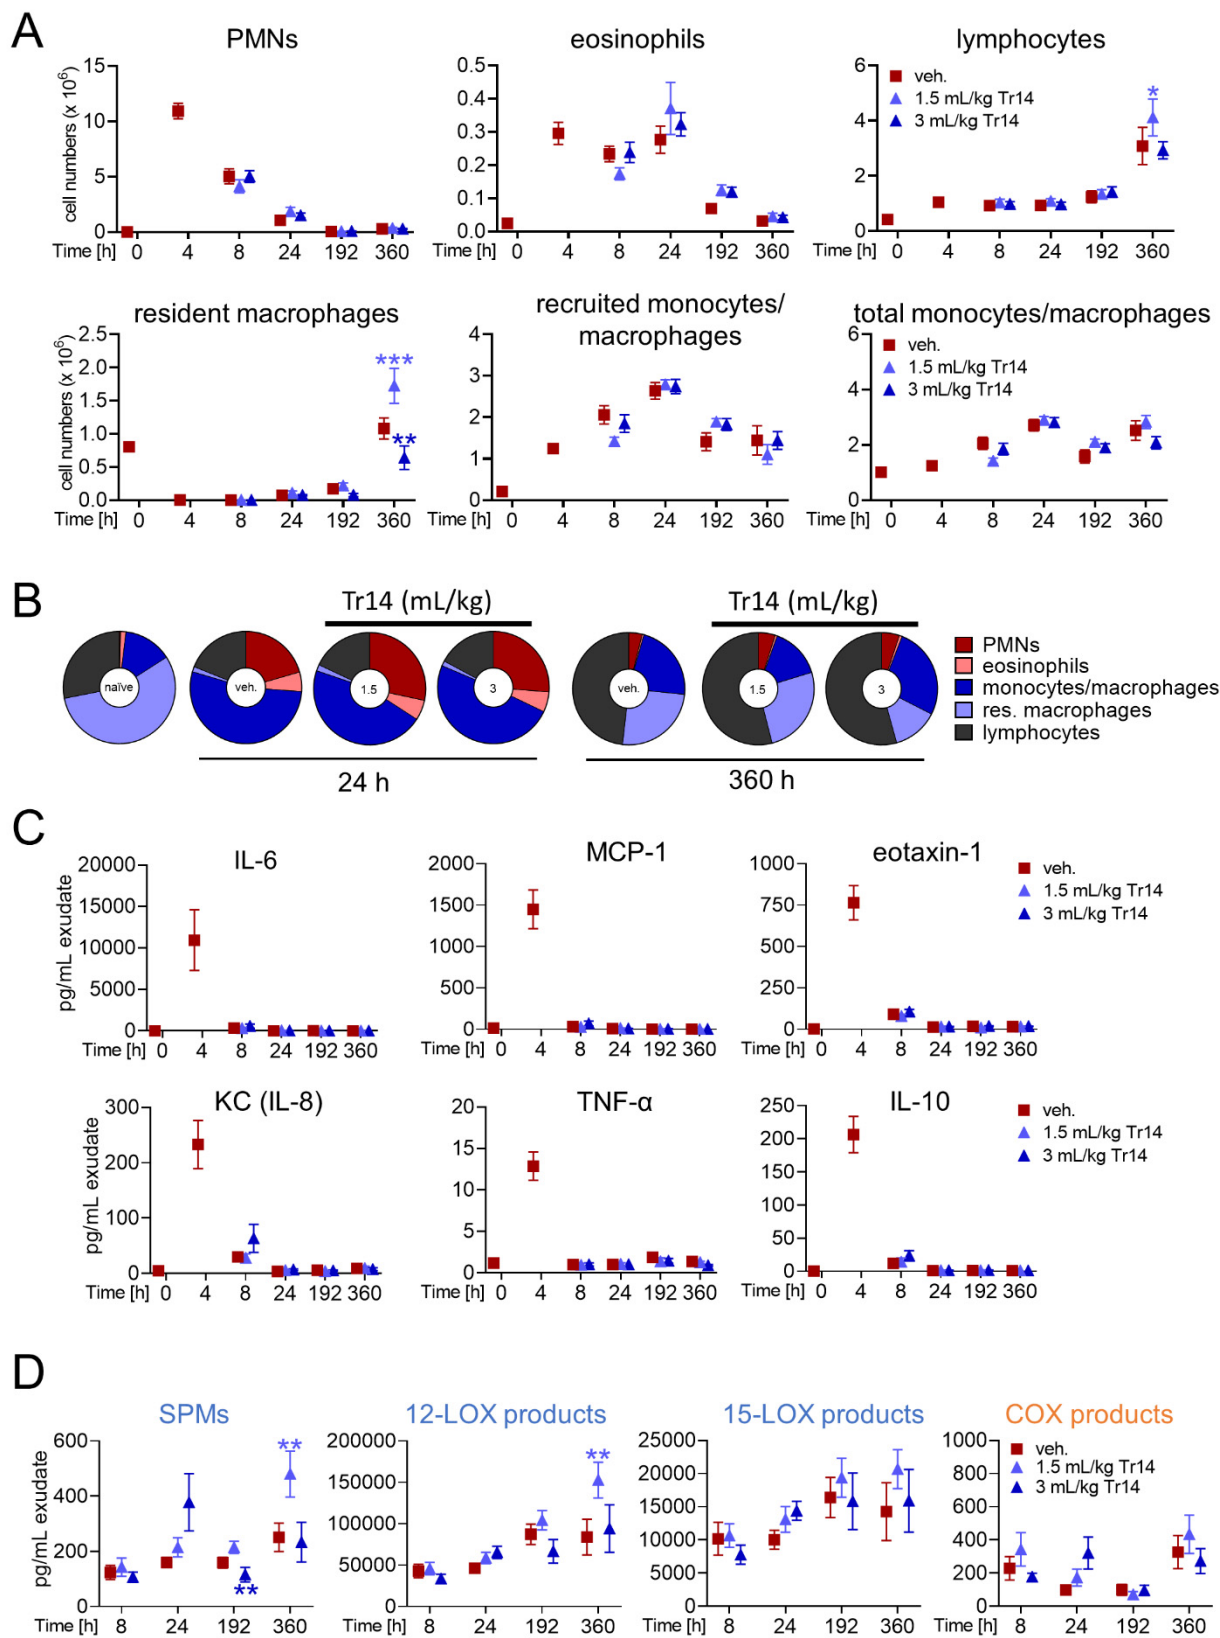

**Supplemental Figure S3:** Self-resolving inflammation was initiated by injecting zymosan (0.1 mg/mouse, *i.p.*) into mice. Tr14 (1.5 mL/kg or 3 mL/kg) or vehicle (veh., 0.9% NaCl) were administered *i.p.* 4 h and 8 h post zymosan injection. Peritoneal exudates were collected 4, 8, 24, 192 and 360 h ( $n = 6-8$ ; outliers were removed) post zymosan injection, and from naïve untreated mice representing time point 0 h ( $n = 6$ ). **(A)** Quantification of cell numbers of PMNs, eosinophils, lymphocytes, resident and recruited monocytes/ macrophages as well as total monocytes/macrophages in the peritoneum, shown as mean  $\pm$  SEM for the indicated time points;  $*p < 0.05$ ;  $**p < 0.01$ ;  $***p < 0.001$ ;  $p$  values were calculated versus vehicle for each time point; unpaired two-way ANOVA with Dunnett's multiple comparison test. **(B)** Cell composition in the peritoneal exudates 24 h and 360 h after zymosan injection against naïve untreated mice are shown in pie charts. **(C)** Cytokine levels were measured at indicated time points and shown in pg/mL exudate as mean  $\pm$  SEM. **(D)** LM levels in peritoneal lavages (summarized in relevant groups: SPMs (LXA<sub>4</sub>, PD1, MaR1, RvD2 and RvD5), 12-LOX products (14-HDHA and 12-HETE), 15-LOX (17-HDHA and 15-HETE) and COX products (PGE<sub>2</sub> and TXB<sub>2</sub>)) at the indicated time points were analyzed by UPLC-MS-MS and are shown in pg/mL exudate as mean  $\pm$  SEM;  $**p < 0.01$ ;  $p$  values were calculated versus vehicle for each time point; unpaired two-way ANOVA with Dunnett's multiple comparison test.

## Suppl. Fig 4

A

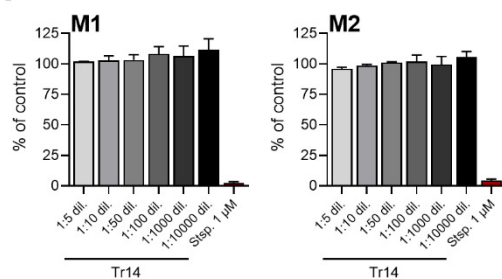

B

|                |                        | 0 100 500           |                     |     |                     |     |  |
|----------------|------------------------|---------------------|---------------------|-----|---------------------|-----|--|
|                |                        | %                   |                     |     |                     |     |  |
| bioactive SPM  |                        | veh.                | Tr14 (0.1%)         | %   | Tr14 (10%)          | %   |  |
|                | RvD5                   | 486 ± 262           | 673 ± 443           | 139 | 1,014 ± 532         | 209 |  |
|                | RvD2                   | 8.4 ± 2.7           | 11 ± 4.2            | 129 | 17 ± 6.0            | 198 |  |
|                | RvD1                   | 13 ± 3.3            | 17 ± 4.7            | 133 | 24 ± 5.8            | 192 |  |
|                | MaR1                   | 42 ± 15             | 64 ± 38             | 153 | 88 ± 36             | 208 |  |
|                | MaR2                   | 43 ± 12             | 59 ± 29             | 136 | 78 ± 47             | 180 |  |
|                | PD1                    | 9.9 ± 2.7           | 14 ± 4.9            | 137 | 17 ± 5.1            | 171 |  |
|                | PDX                    | 25 ± 9.3            | 36 ± 19             | 144 | 48 ± 19             | 194 |  |
|                | LXA <sub>4</sub>       | 26 ± 12             | 30 ± 3.3            | 113 | 30 ± 3.3            | 113 |  |
|                | 5,15-diHETE            | 425 ± 122           | 540 ± 218           | 127 | 776 ± 245           | 182 |  |
| SPM precursors | 18-HEPE                | 127 ± 32            | 153 ± 35            | 120 | 180 ± 13            | 142 |  |
|                | 17-HDHA                | 17,390 ± 5,110      | 23,016 ± 9,928      | 132 | 27,904 ± 10,411     | 160 |  |
|                | 15-HEPE                | 2,796 ± 534         | 3,501 ± 1,136       | 125 | 4,482 ± 1,011       | 160 |  |
|                | 15-HETE                | 21,009 ± 2,129      | 24,645 ± 5,792      | 117 | 30,440 ± 5,106      | 145 |  |
|                | 14-HDHA                | 1,505 ± 484         | 1,891 ± 810         | 126 | 2,768 ± 870         | 184 |  |
|                | 12-HEPE                | 323 ± 76            | 386 ± 129.5         | 119 | 540 ± 130           | 167 |  |
|                | 12-HETE                | 1,084 ± 219         | 1,289 ± 360         | 119 | 1,877 ± 310         | 173 |  |
|                | 11-HEPE                | 89 ± 20             | 107 ± 27            | 120 | 121 ± 17            | 135 |  |
|                | 11-HETE                | 812 ± 185           | 935 ± 231           | 115 | 1,147 ± 178         | 141 |  |
|                | 10-HDHA                | 646 ± 190           | 794 ± 336           | 123 | 1,151 ± 359         | 178 |  |
|                | 8-HETE                 | 433 ± 58            | 531 ± 119           | 123 | 685 ± 128           | 158 |  |
|                | 7-HDHA                 | 299 ± 35            | 409 ± 118           | 137 | 481 ± 107           | 161 |  |
|                | 4-HDHA                 | 150 ± 40            | 183 ± 27            | 122 | 213 ± 19            | 142 |  |
| 5-LOX          | LTB <sub>4</sub>       | 93 ± 31             | 109 ± 26            | 116 | 109 ± 9.0           | 117 |  |
|                | t-LTB <sub>4</sub>     | 53 ± 13             | 56 ± 3.8            | 107 | 69 ± 2.7            | 131 |  |
|                | 20-OH-LTB <sub>4</sub> | 0.6 ± 0.1           | 0.8 ± 0.3           | 144 | 0.9 ± 0.3           | 155 |  |
|                | 5-HETE                 | 1,055 ± 363         | 1,232 ± 273         | 117 | 1,299 ± 227         | 123 |  |
|                | 5-HEPE                 | 200 ± 77            | 243 ± 77            | 122 | 253 ± 57            | 127 |  |
| COX            | PGE <sub>2</sub>       | 185 ± 66            | 208 ± 39            | 112 | 240 ± 15            | 129 |  |
|                | PGD <sub>2</sub>       | 65 ± 23             | 72 ± 19             | 110 | 86 ± 16             | 132 |  |
|                | PGF <sub>2α</sub>      | 952 ± 417           | 1,044 ± 317         | 110 | 1,094 ± 235         | 115 |  |
|                | TXB <sub>2</sub>       | 19,772 ± 7,319      | 23,869 ± 6,969      | 121 | 25,169 ± 6,242      | 127 |  |
| fatty acids    | AA                     | 1,689,082 ± 415,484 | 1,685,400 ± 255,420 | 100 | 1,681,649 ± 263,883 | 100 |  |
|                | EPA                    | 632,025 ± 160,029   | 642,925 ± 100,045   | 102 | 648,950 ± 114,521   | 103 |  |
|                | DHA                    | 320,482 ± 71,164    | 335,587 ± 41,132    | 105 | 330,627 ± 47,100    | 103 |  |

**Supplemental Figure S4:** (A) Cytotoxicity of Tr14. Human naïve MDM ( $M_{GM-CSF}$  and  $M_{M-CSF}$ ,  $1 \times 10^5$ ) were incubated with different concentrations of Tr14 or 0.9% NaCl as vehicle or 1  $\mu$ M staurosporine (Stsp.) as positive control and polarized for 48 h with LPS/IFN $\gamma$  to M1- and with IL-4 to M2-MDM at 37 °C. M1- and M2-MDM were then incubated with MTT (5 mg/mL, 20  $\mu$ L) for 2 h at 37 °C. The formazan product was solubilized with SDS (10% in 20 mM HCl) and the absorbance was measured at 570 nm. Results are given in % of control (0.9% NaCl), n = 3. (B) Human MDM were preincubated with 0.1 or 10% of Tr14 or vehicle (0.9% NaCl solution) for 15 min and then polarized for 48 h with IL-4 to M2-MDM. Then, cells were incubated with *S. aureus* (LS1; ratio 1:50) in PBS pH 7.4 containing 1 mM CaCl $_2$  for another 180 min. Formed LM were extracted from the supernatants and analyzed by UPLC-MS-MS, and are given as means in pg/ $2 \times 10^6$  cells  $\pm$  SEM and % of vehicle was shown in a heat map; n = 3 separate donors.

**Supplemental Table S1:** Composition of Traumeel (Tr14), solution for injection.

| Component                                                                                                                                                                                                           | Manufacturing method<br>(Ph. Eur.) | µg/mL in Tr14 |
|---------------------------------------------------------------------------------------------------------------------------------------------------------------------------------------------------------------------|------------------------------------|---------------|
| <i>Plant extracts</i>                                                                                                                                                                                               |                                    |               |
| <i>Achillea millefolium</i> L. (common yarrow), fresh aerial parts collected at flowering time.                                                                                                                     | Method 1.1.5                       | 3             |
| <i>Aconitum napellus</i> L. (monkshood), fresh whole plants collected at the start of flowering.                                                                                                                    | Method 1.1.3                       | 12            |
| <i>Arnica montana</i> L. (arnica), dried underground parts.                                                                                                                                                         | Method 1.1.8                       | 100           |
| <i>Atropa belladonna</i> L. (deadly nightshade), whole fresh flowering plant harvested at the end of flowering, with the ligneous base of the stems removed.                                                        | Method 1.1.3                       | 20            |
| <i>Bellis perennis</i> L. (daisy), whole fresh flowering plants.                                                                                                                                                    | Method 1.1.3                       | 10            |
| <i>Calendula officinalis</i> L. (pot marigold), fresh aerial parts collected at flowering time.                                                                                                                     | Method 1.1.5                       | 30            |
| <i>Echinacea</i> ; whole fresh flowering plants of <i>Echinacea angustifolia</i> D.C. (narrow-leaf purple coneflower) and <i>Echinacea pallida</i> (Nutt.) Nutt. (pale purple coneflower), single species or mixed. | Method 1.1.5                       | 7.5           |
| <i>Echinacea purpurea</i> (L.) Moench (Eastern purple coneflower), fresh aerial parts collected at flowering time.                                                                                                  | Method 1.1.5                       | 7.5           |
| <i>Hamamelis virginiana</i> L. (American witch-hazel), fresh bark from roots or branches or a mixture thereof.                                                                                                      | Method 1.1.5                       | 30            |
| <i>Hypericum perforatum</i> L. (common St. John's-wort), whole fresh plant collected at the beginning of the flowering period.                                                                                      | Method 1.1.5                       | 9             |
| <i>Matricaria recutita</i> L. (German chamomile), whole fresh flowering plants.                                                                                                                                     | Method 1.1.5                       | 3             |
| <i>Symphytum officinale</i> L. (common comfrey), fresh underground parts collected prior to flowering.                                                                                                              | Method 1.1.5                       | 0.003         |
| <i>Chemical substances</i>                                                                                                                                                                                          |                                    |               |
| Hepar sulfuris, obtained by calcining a mixture of Calcium carbonicum Hahnemanni and sulfur.                                                                                                                        | Method 4.1.1                       | 0.001         |
| Mercurius solubilis Hahnemanni, a mixture of mainly mercury (II) amidonitrate and metallic mercury.                                                                                                                 | Method 4.1.1                       | 0.0005        |
